# Supplementary material
Source: PubMed Central journal article supplement (PMC3281769)

### Supplemental Figure 1

Cos-7 cells were transfected with the indicated plasmids, together with CMX- $\beta$ -galactosidase transfection control and MH100x4-tk-luc reporter. Transfected cells were treated with 0.1% DMSO (solvent control) or the indicated concentrations of the potent and selective RXR agonist AGN195203. Data are expressed as relative light units (normalized to  $\beta$ -galactosidase)  $\pm$  S.E.M. and represent the average of triplicates  $\pm$  S.E.M.

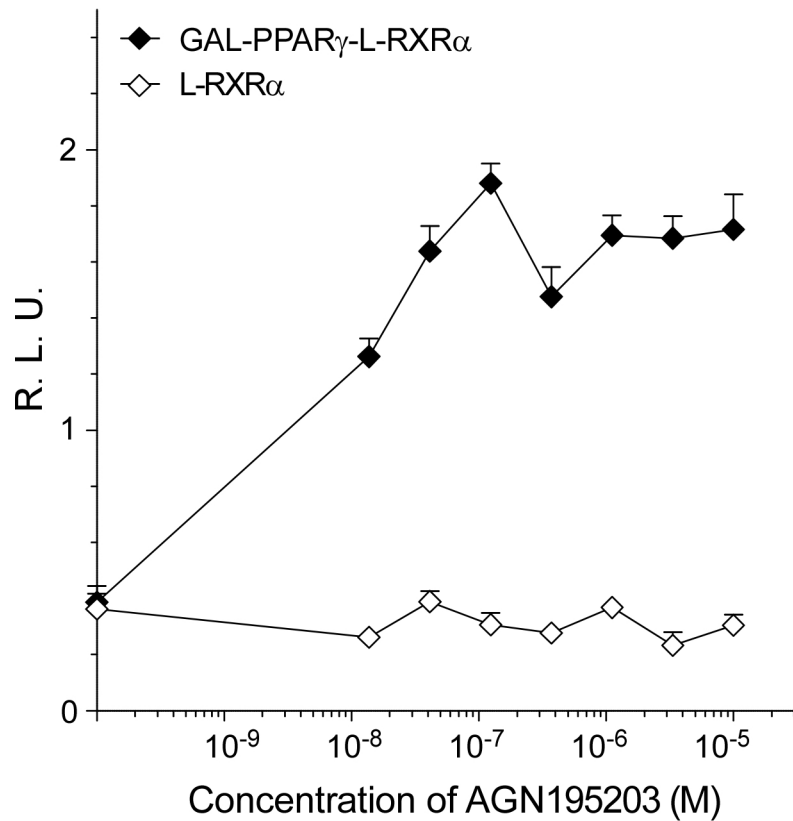

Supplement: NIHMS287806-supplement-1.pdf [file NIHMS287806-supplement-1.pdf]
